# Supplementary material for: The effect of oxidative stress on the bursopentin peptide structure: a theoretical study
Source: Royal Society of Chemistry journal article supplement (doi:10.1039/c3cp54799j), 2014-01-01
Supplement: c3cp54799j1.pdf [file c3cp54799j1.pdf]

## The Effect of Oxidative Stress on Bursopentin Peptide Structure: A Theoretical Study

A. T. Lam,<sup>a</sup> E. P. Faragó,<sup>b</sup> M. C. Owen,<sup>a,b</sup> B. Fiser,<sup>b</sup> B. Jójárt,<sup>b</sup> S. J. K. Jensen,<sup>c</sup> I. G. Csizmadia<sup>a,b</sup>  
and B. Viskolcz<sup>b</sup>

<sup>a</sup> Department of Chemistry, University of Toronto, 80 St. George St., Toronto, Ontario, Canada, M5S

<sup>b</sup> Drug Discovery Research Center, Department of Chemical Informatics, Faculty of Education, University of Szeged, Boldogasszony sgt 6, Szeged, Hungary-6725

<sup>c</sup> Materials Science Research Institute, Semmelweis University, Szentkirályi u 47, Budapest, Hungary-1088

### Supplementary Results

**Table S1.** The percentage value of zero represents no secondary structure. The value obtained in the parentheses shows the amount of turn in 2000 structures. CKRVY has not RMSD value because this is the reference structure.

| Peptide<br>RMSD / Å<br>Radius of Gyration / Å | Residue          | Secondary Structure Element |                  |                      |             |
|-----------------------------------------------|------------------|-----------------------------|------------------|----------------------|-------------|
|                                               |                  | 3-10 helix                  | Parallel β-Sheet | Antiparallel β-Sheet | Turn        |
| CKRVY<br>-<br>5.800 ± 0.397                   | Cys <sup>1</sup> | 0.00                        | 0.00             | 0.00                 | 0.00        |
|                                               | Lys <sup>2</sup> | 0.05 (1)                    | 0.00             | 0.00                 | 0.95 (19)   |
|                                               | Arg <sup>3</sup> | 0.05 (1)                    | 0.00             | 0.00                 | 1.50 (30)   |
|                                               | Val <sup>4</sup> | 0.05 (1)                    | 0.00             | 0.00                 | 0.55 (11)   |
|                                               | Tyr <sup>5</sup> | 0.00                        | 0.00             | 0.00                 | 0.00        |
| cKRVY<br>5.58 ± 0.11<br>5.858 ± 0.397         | Cys <sup>1</sup> | 0.00                        | 0.00             | 0.00                 | 0.00        |
|                                               | Lys <sup>2</sup> | 0.10 (2)                    | 0.00             | 0.00                 | 1.15 (23)   |
|                                               | Arg <sup>3</sup> | 0.10 (2)                    | 0.00             | 0.00                 | 1.40 (28)   |
|                                               | Val <sup>4</sup> | 0.10 (2)                    | 0.00             | 0.00                 | 0.25 (5)    |
|                                               | Tyr <sup>5</sup> | 0.00                        | 0.00             | 0.00                 | 0.00        |
| CkRVY<br>6.28 ± 0.20<br>5.886 ± 0.393         | Cys <sup>1</sup> | 0.00                        | 0.00             | 0.00                 | 0.00        |
|                                               | Lys <sup>2</sup> | 0.00                        | 0.00             | 0.00                 | 4.70 (94)   |
|                                               | Arg <sup>3</sup> | 0.00                        | 0.00             | 0.00                 | 4.95 (99)   |
|                                               | Val <sup>4</sup> | 0.00                        | 0.00             | 0.00                 | 0.25 (5)    |
|                                               | Tyr <sup>5</sup> | 0.00                        | 0.00             | 0.00                 | 0.00        |
| CKrVY<br>5.74 ± 0.42<br>5.740 ± 0.417         | Cys <sup>1</sup> | 0.00                        | 0.00             | 0.00                 | 0.00        |
|                                               | Lys <sup>2</sup> | 0.15 (3)                    | 0.05 (1)         | 0.65 (13)            | 11.50 (230) |
|                                               | Arg <sup>3</sup> | 0.15 (3)                    | 0.00             | 0.00                 | 13.85 (277) |
|                                               | Val <sup>4</sup> | 0.15 (3)                    | 0.00             | 0.00                 | 2.65 (53)   |
|                                               | Tyr <sup>5</sup> | 0.00                        | 0.05 (1)         | 0.65 (13)            | 0.00        |
| CKRvY<br>5.85 ± 0.35<br>5.854 ± 0.350         | Cys <sup>1</sup> | 0.00                        | 0.00             | 0.00                 | 0.00        |
|                                               | Lys <sup>2</sup> | 0.10 (2)                    | 0.00             | 0.10                 | 0.55 (11)   |
|                                               | Arg <sup>3</sup> | 0.10 (2)                    | 0.00             | 0.00                 | 1.30 (26)   |
|                                               | Val <sup>4</sup> | 0.10 (2)                    | 0.00             | 0.00                 | 0.75 (15)   |
|                                               | Tyr <sup>5</sup> | 0.00                        | 0.00             | 0.10                 | 0.00        |

| Peptide<br>RMSD / Å<br>Radius of Gyration / Å | Residue          | Secondary Structure Element |                  |                      |           |
|-----------------------------------------------|------------------|-----------------------------|------------------|----------------------|-----------|
|                                               |                  | 3-10 helix                  | Parallel β-Sheet | Antiparallel β-Sheet | Turn      |
| CKRVy<br>5.96 ± 0.35<br>5.960 ± 0.352         | Cys <sup>1</sup> | 0.00                        | 0.00             | 0.00                 | 0.00      |
|                                               | Lys <sup>2</sup> | 0.05 (1)                    | 0.00             | 0.00                 | 0.60 (12) |
|                                               | Arg <sup>3</sup> | 0.05 (1)                    | 0.00             | 0.00                 | 0.75 (15) |
|                                               | Val <sup>4</sup> | 0.05 (1)                    | 0.00             | 0.00                 | 0.25 (5)  |
|                                               | Tyr <sup>5</sup> | 0.00                        | 0.00             | 0                    | 0.00      |

**Table S2.** Bond lengths and dihedral angles within residue 3 of *bursopentin* with the C<sub>α</sub> of each residue in the L configuration, in the extended conformation (LLLLL<sub>EXT</sub>) and minimum energy conformation (LLLLL<sub>MIN</sub>). The bond lengths within each respective residue containing a C<sub>α</sub>-centered radical (R) and the C<sub>α</sub> in the D configuration (D) are also shown. Each parameter is also shown for the respective residue containing a C<sub>α</sub>-centered radical (R) and the C<sub>α</sub> in the D configuration (D). Each structure was optimized at the B3LYP/6-31G(d) level of theory using the SMD solvent model. (\*) represents the position of the residue that is undergoing analysis.

| Peptide Structure     | "n - 1" amide | Bond Length (Å) |                  |                                |                   |             | C=O   | "n + 1" amide | Dihedral Angle |       | Backbone Length / Å |
|-----------------------|---------------|-----------------|------------------|--------------------------------|-------------------|-------------|-------|---------------|----------------|-------|---------------------|
|                       |               | N-H             | N-C <sub>α</sub> | C <sub>α</sub> -C <sub>β</sub> | C <sub>α</sub> -C | φ / degrees |       |               | ψ / degrees    |       |                     |
| CKRVY <sub>EXT</sub>  | ----          | 1.010           | 1.488            | 1.525                          | 1.523             | 1.229       | 1.335 | ----          | 137.7          | 16.40 |                     |
| C'KRVY <sub>EXT</sub> | ----          | 1.037           | 1.459            | 1.472                          | 1.473             | 1.251       | 1.346 | ----          | 178.8          | 15.81 |                     |
| cKRVY <sub>EXT</sub>  | ----          | 1.023           | 1.505            | 1.532                          | 1.538             | 1.239       | 1.338 | ----          | -132.3         | 16.09 |                     |
| CKRVY <sub>EXT</sub>  | 1.336         | 1.016           | 1.462            | 1.548                          | 1.534             | 1.243       | 1.342 | -151.0        | 146.4          | 16.40 |                     |
| CK'RVY <sub>EXT</sub> | 1.361         | 1.022           | 1.380            | 1.495                          | 1.470             | 1.256       | 1.354 | -177.8        | 175.7          | 16.19 |                     |
| CkRVY <sub>EXT</sub>  | 1.338         | 1.016           | 1.462            | 1.546                          | 1.533             | 1.242       | 1.344 | 153.1         | -141.8         | 15.05 |                     |
| CKRVY <sub>EXT</sub>  | 1.342         | 1.015           | 1.459            | 1.550                          | 1.533             | 1.242       | 1.344 | -153.0        | 149.9          | 16.40 |                     |
| CKR'VY <sub>EXT</sub> | 1.366         | 1.021           | 1.380            | 1.499                          | 1.468             | 1.255       | 1.363 | 176.6         | 179.6          | 14.46 |                     |
| CKrVY <sub>EXT</sub>  | 1.343         | 1.015           | 1.462            | 1.546                          | 1.533             | 1.244       | 1.341 | 162.1         | -139.9         | 14.50 |                     |
| CKRVY <sub>EXT</sub>  | 1.344         | 1.015           | 1.460            | 1.560                          | 1.536             | 1.247       | 1.336 | -136.3        | 152.6          | 16.40 |                     |
| CKRV'Y <sub>EXT</sub> | 1.365         | 1.022           | 1.387            | 1.512                          | 1.473             | 1.262       | 1.348 | -156.9        | 176.5          | 16.53 |                     |
| CKRvY <sub>EXT</sub>  | 1.342         | 1.015           | 1.461            | 1.561                          | 1.534             | 1.247       | 1.338 | 155.8         | -146.9         | 14.97 |                     |
| CKRVY <sub>EXT</sub>  | 1.336         | 1.018           | 1.460            | 1.564                          | 1.555             | 1.265       | ----  | -159.5        | ----           | 16.40 |                     |
| CKRVY <sub>EXT</sub>  | 1.365         | 1.022           | 1.387            | 1.512                          | 1.492             | 1.273       | ----  | -177.5        | ----           | 15.02 |                     |
| CKRVy <sub>EXT</sub>  | 1.339         | 1.016           | 1.460            | 1.557                          | 1.550             | 1.263       | ----  | 161.1         | ----           | 16.15 |                     |
| CKRVY <sub>MIN</sub>  | ----          | 1.027           | 1.497            | 1.536                          | 1.537             | 1.238       | 1.339 | 0.0           | 152.32         | 14.01 |                     |
| C'KRVY <sub>MIN</sub> | ----          | 1.037           | 1.460            | 1.473                          | 1.471             | 1.250       | 1.348 | 0.0           | 178.88         | 15.81 |                     |
| cKRVY <sub>MIN</sub>  | ----          | 1.030           | 1.499            | 1.534                          | 1.536             | 1.238       | 1.339 | 0.0           | -143.51        | 16.10 |                     |
| CKRVY <sub>MIN</sub>  | 1.339         | 1.014           | 1.462            | 1.540                          | 1.542             | 1.240       | 1.345 | -151.0        | 146.45         | 14.01 |                     |
| CK'RVY <sub>MIN</sub> | 1.360         | 1.023           | 1.380            | 1.500                          | 1.469             | 1.256       | 1.353 | -177.8        | 175.76         | 17.23 |                     |

|                              |       |       |       |       |       |       |       |        |        |       |
|------------------------------|-------|-------|-------|-------|-------|-------|-------|--------|--------|-------|
| <b>CkRVY<sub>MIN</sub></b>   | 1.338 | 1.016 | 1.463 | 1.546 | 1.532 | 1.243 | 1.342 | 153.6  | -140.7 | 15.04 |
| <b>CKRVY<sub>MIN</sub></b>   | 1.345 | 1.015 | 1.456 | 1.550 | 1.533 | 1.241 | 1.346 | -153.0 | 150.0  | 14.01 |
| <b>CKR'VY<sub>MIN</sub></b>  | 1.368 | 1.024 | 1.404 | 1.501 | 1.473 | 1.248 | 1.367 | 138.9  | -31.0  | 3.37  |
| <b>CKrVY<sub>MIN</sub></b>   | 1.345 | 1.015 | 1.467 | 1.536 | 1.541 | 1.237 | 1.352 | 131.3  | -80.2  | 3.42  |
| <b>CKRVY<sub>MIN</sub></b>   | 1.346 | 1.013 | 1.456 | 1.556 | 1.542 | 1.247 | 1.338 | -136.3 | 152.7  | 14.01 |
| <b>CKRV'Y<sub>MIN</sub></b>  | 1.369 | 1.017 | 1.393 | 1.509 | 1.481 | 1.251 | 1.355 | 45.0   | -150.8 | 12.83 |
| <b>CKRvY<sub>MIN</sub></b>   | 1.346 | 1.013 | 1.459 | 1.553 | 1.543 | 1.243 | 1.345 | 62.7   | -144.3 | 12.58 |
| <b>CKRVY<sub>MIN</sub></b>   | 1.338 | 1.019 | 1.459 | 1.562 | 1.557 | 1.260 | ----  | -159.4 | 0.0    | 14.01 |
| <b>CKRVY'<sub>MIN</sub></b>  | 1.369 | 1.018 | 1.398 | 1.501 | 1.487 | 1.274 | ----  | 45.9   | 0.0    | 11.93 |
| <b>CKRvY<sub>MIN</sub></b>   | 1.346 | 1.013 | 1.462 | 1.544 | 1.552 | 1.267 | ----  | 76.6   | 0.0    | 12.00 |
| <b>CKRVY<sub>RMSD</sub></b>  | ----  | 1.008 | 1.486 | 1.548 | 1.536 | 1.235 | 1.342 | 0.0    | 157.4  | 15.02 |
| <b>C'KRVY<sub>RMSD</sub></b> | ----  | 1.009 | 1.487 | 1.548 | 1.540 | 1.235 | 1.342 | 0.0    | -179.7 | 14.07 |
| <b>cKRVY<sub>RMSD</sub></b>  | ----  | 1.028 | 1.504 | 1.532 | 1.537 | 1.239 | 1.339 | 0.0    | -156.6 | 15.08 |
| <b>CKRVY<sub>RMSD</sub></b>  | 1.342 | 1.012 | 1.478 | 1.542 | 1.539 | 1.236 | 1.338 | -69.4  | 144.6  | 15.02 |
| <b>CKR'VY<sub>RMSD</sub></b> | 1.334 | 1.013 | 1.483 | 1.542 | 1.538 | 1.233 | 1.340 | 27.2   | 4.4    | 12.73 |
| <b>CkRVY<sub>RMSD</sub></b>  | 1.344 | 1.015 | 1.461 | 1.540 | 1.537 | 1.240 | 1.347 | 79.4   | 14.2   | 15.67 |
| <b>CKRVY<sub>RMSD</sub></b>  | 1.338 | 1.011 | 1.478 | 1.544 | 1.537 | 1.232 | 1.334 | -144.9 | 166.2  | 15.02 |
| <b>CKR'VY<sub>RMSD</sub></b> | 1.350 | 1.014 | 1.460 | 1.537 | 1.542 | 1.247 | 1.338 | -133.7 | 61.4   | 13.88 |
| <b>CKrVY<sub>RMSD</sub></b>  | 1.377 | 1.017 | 1.391 | 1.499 | 1.465 | 1.253 | 1.336 | -164.0 | 48.9   | 12.29 |
| <b>CKRVY<sub>RMSD</sub></b>  | 1.334 | 1.009 | 1.478 | 1.544 | 1.536 | 1.236 | 1.337 | 39.5   | 159.1  | 15.02 |
| <b>CKRV'Y<sub>RMSD</sub></b> | 1.371 | 1.017 | 1.391 | 1.514 | 1.486 | 1.253 | 1.353 | 42.4   | -148.7 | 13.05 |
| <b>CKRvY<sub>RMSD</sub></b>  | 1.351 | 1.014 | 1.457 | 1.557 | 1.548 | 1.245 | 1.346 | 73.1   | -153.2 | 13.35 |
| <b>CKRVY<sub>RMSD</sub></b>  | 1.337 | 1.015 | 1.474 | 1.537 | 1.541 | 1.251 | ----  | -137.2 | ----   | 15.02 |
| <b>CKRVY'<sub>RMSD</sub></b> | 1.370 | 1.017 | 1.400 | 1.502 | 1.483 | 1.273 | ----  | 45.4   | ----   | 11.8  |
| <b>CKRvY<sub>RMSD</sub></b>  | 1.345 | 1.014 | 1.466 | 1.542 | 1.553 | 1.266 | ----  | 57.4   | 0.0    | 12.01 |
